# Supplementary material
Source: publisher figshare collection journal article supplement (https://tandf.figshare.com/ndownloader/files/18185171)
Supplement: Supplementary file 1 [file 18185171]

Table S1. Temperature, relative humidity, and rainfall in the Kosti area during the sorghum growing season (June through to November) of 2015.

| 2015 | | | | | | |
| --- | --- | --- | --- | --- | --- | --- |
|  |  |  | Months |  |  |  |
| June | July | Aug. | Sep. | Oct. | Nov. |
| Monthly average maximum temperature (°C) | 39.1 | 37.8 | 33.1 | 35.8 | 37.9 | 35.6 |
| Monthly average minimum temperature (°C) | 25.7 | 25.6 | 23.5 | 24 | 25.2 | 21.7 |
| Relative humidity (%) | 59 | 61 | 76 | 70 | 59 | 36 |
| Monthly precipitation (mm) | 54 | 85 | 119 | 52 | 2 | 0 |

Figure S1. Location of the research site in Kosti, Sudan.

Figure S2. Average number of arbuscular mycorrhizal fungi operational taxonomic units (OTUs) per individual detected in 19 genotypes of sorghum. Bars show standard error.
